# Supplementary material
Source: PubMed Central journal article supplement (PMC3545294)
Supplement: emboj2012318s1.pdf [file emboj2012318s1.pdf]

Supplemental Material: Binding determinants of the small heat shock protein,  $\alpha$ B-crystallin: recognition of the “IxI” motif

Scott Delbecq<sup>1</sup>, Stefan Jehle<sup>1</sup>, Ponni Rajagopal<sup>1</sup> and Rachel E Klevit<sup>1</sup>

<sup>1</sup> Department of Biochemistry, University of Washington, 1705 Pacific St. Seattle, WA 98115, USA

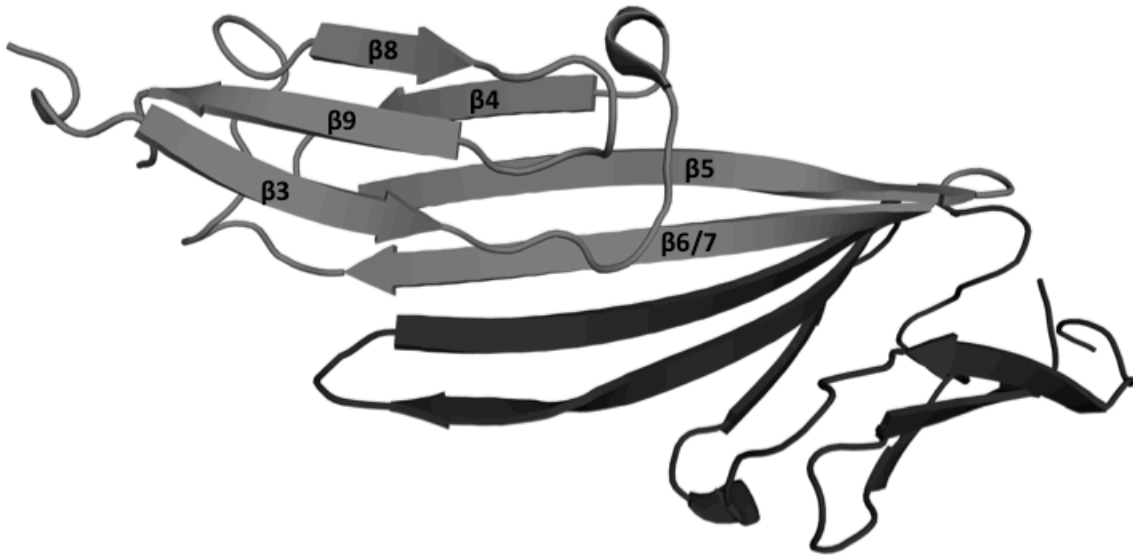

Supplemental Figure S1. Secondary structure representation of the  $\alpha$ B-ACD determined by ssNMR (2KLR). The two monomers are shown in different shades of gray and  $\beta$  strands are labeled.

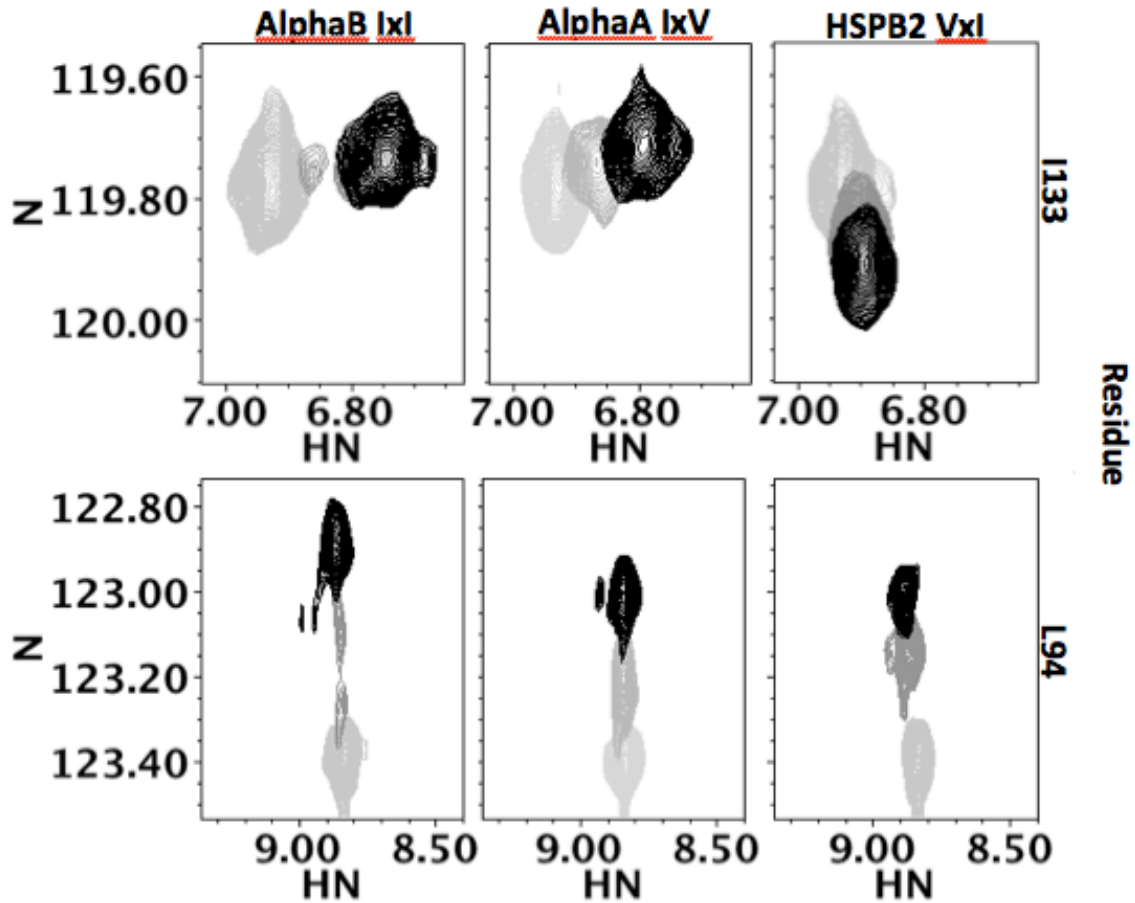

Supplemental figure S2.  $\alpha$ B-IxI peptide,  $\alpha$ A-IxV and HSPB2-VxI peptides show different affinities and residence times. The resonances of residue I133 (Top) from the  $\beta$ 8 strand and L94 (Bottom) from the  $\beta$ 4 strand of the  $\alpha$ B ACD are plotted in the absence of peptide and in the presence of 1-fold and 4-fold  $\alpha$ B-IxI-peptide (Left) and  $\alpha$ A-IxV peptide (Middle) and HSPB2 peptide (Right). Overlay of spectra measured from  $\alpha$ B-ACD samples containing no peptide, 1-fold, 2-fold and 4-fold excess peptide are shown in progressively darker shades of gray. Broadening in the spectrum collected with 1-fold  $\alpha$ B-IxI reflects the longer lifetime (Left Bottom) of the bound state relative to the other peptides.

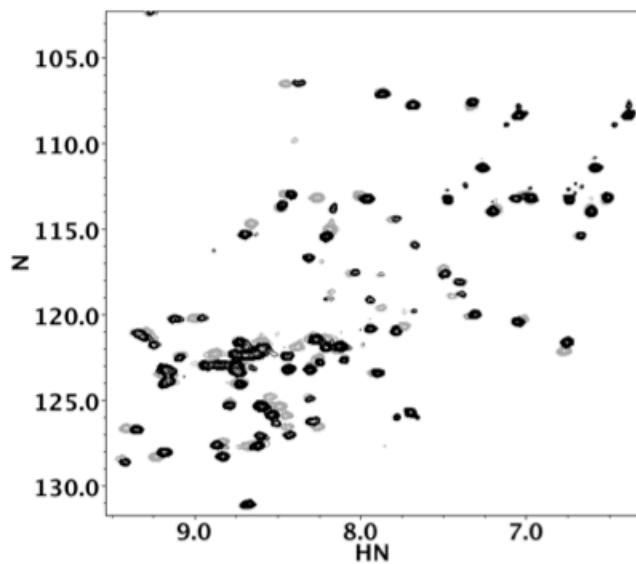

Supplemental Figure S3.  $^1\text{H}$ - $^{15}\text{N}$  HSQC Spectra of wt  $\alpha\text{B-ACD}$  (Gray) and the  $\beta 8$  mutant S135Q  $\alpha\text{B-ACD}$  indicate the mutant does not disrupt the ACD structure (Black). Peaks that show a chemical shift greater than .1 as a result of the mutation are V77, V91, L131, I133, T134, S136 and V145.

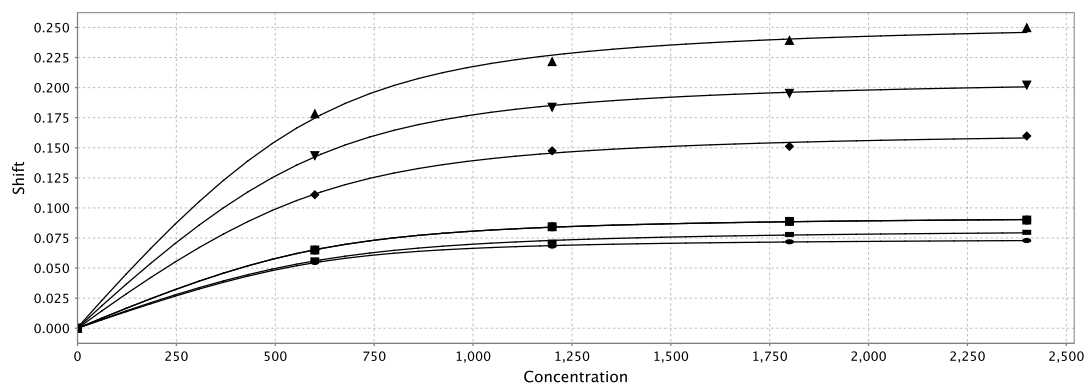

Supplemental Figure S4. Chemical shift perturbations fit to quadratic binding curves for the HSPB2 peptide. 6 peaks were fit for the HSPB2 peptide (92, 94, 136, 95, 78, 127 and 97) yielding an average  $K_d$  of  $87 \pm 12 \mu\text{M}$ . Chemical shift perturbation is plotted on the y-axis and total peptide concentration ( $\mu\text{M}$ ) is plotted on the x-axis.
